# Supplementary material
Source: MDPI journal article supplement (https://www.mdpi.com/2075-163X/10/5/466)
Supplement: s1 [file s1]

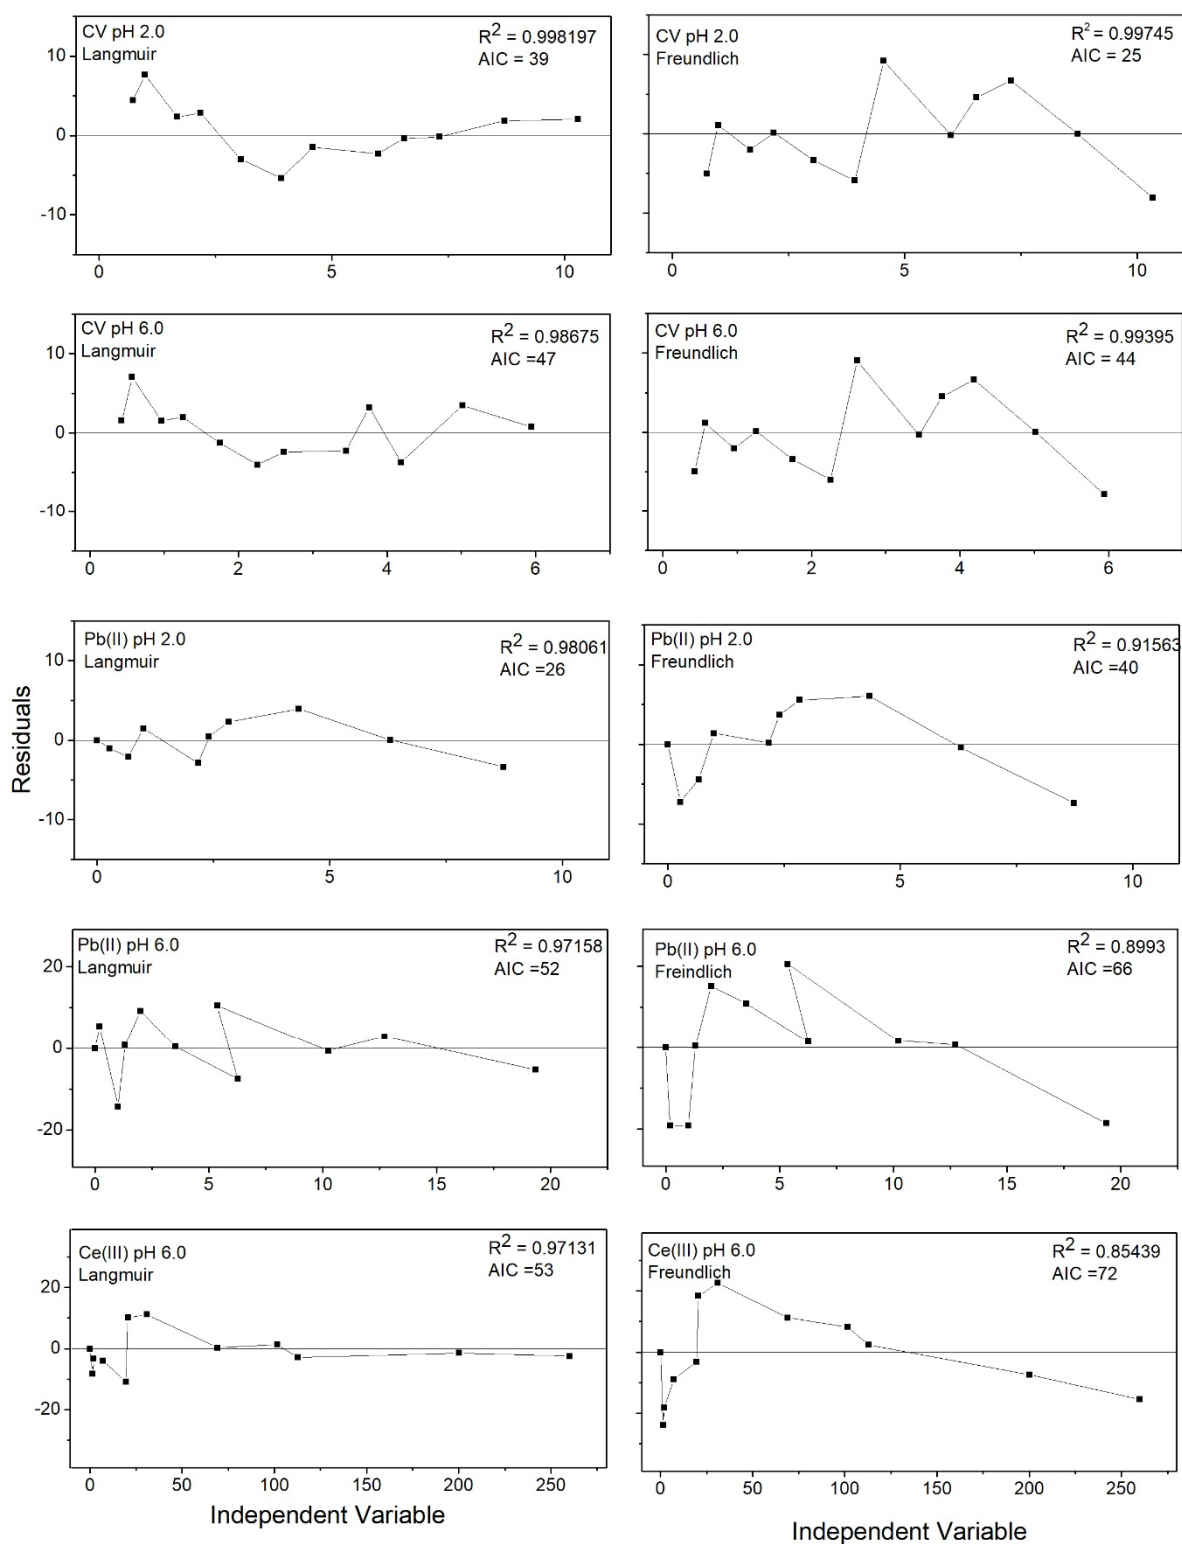

**Figure S1.** Residuals plot for the adsorption isotherms reported in Figure 4, fitted by using the Langmuir and the Freundlich models.

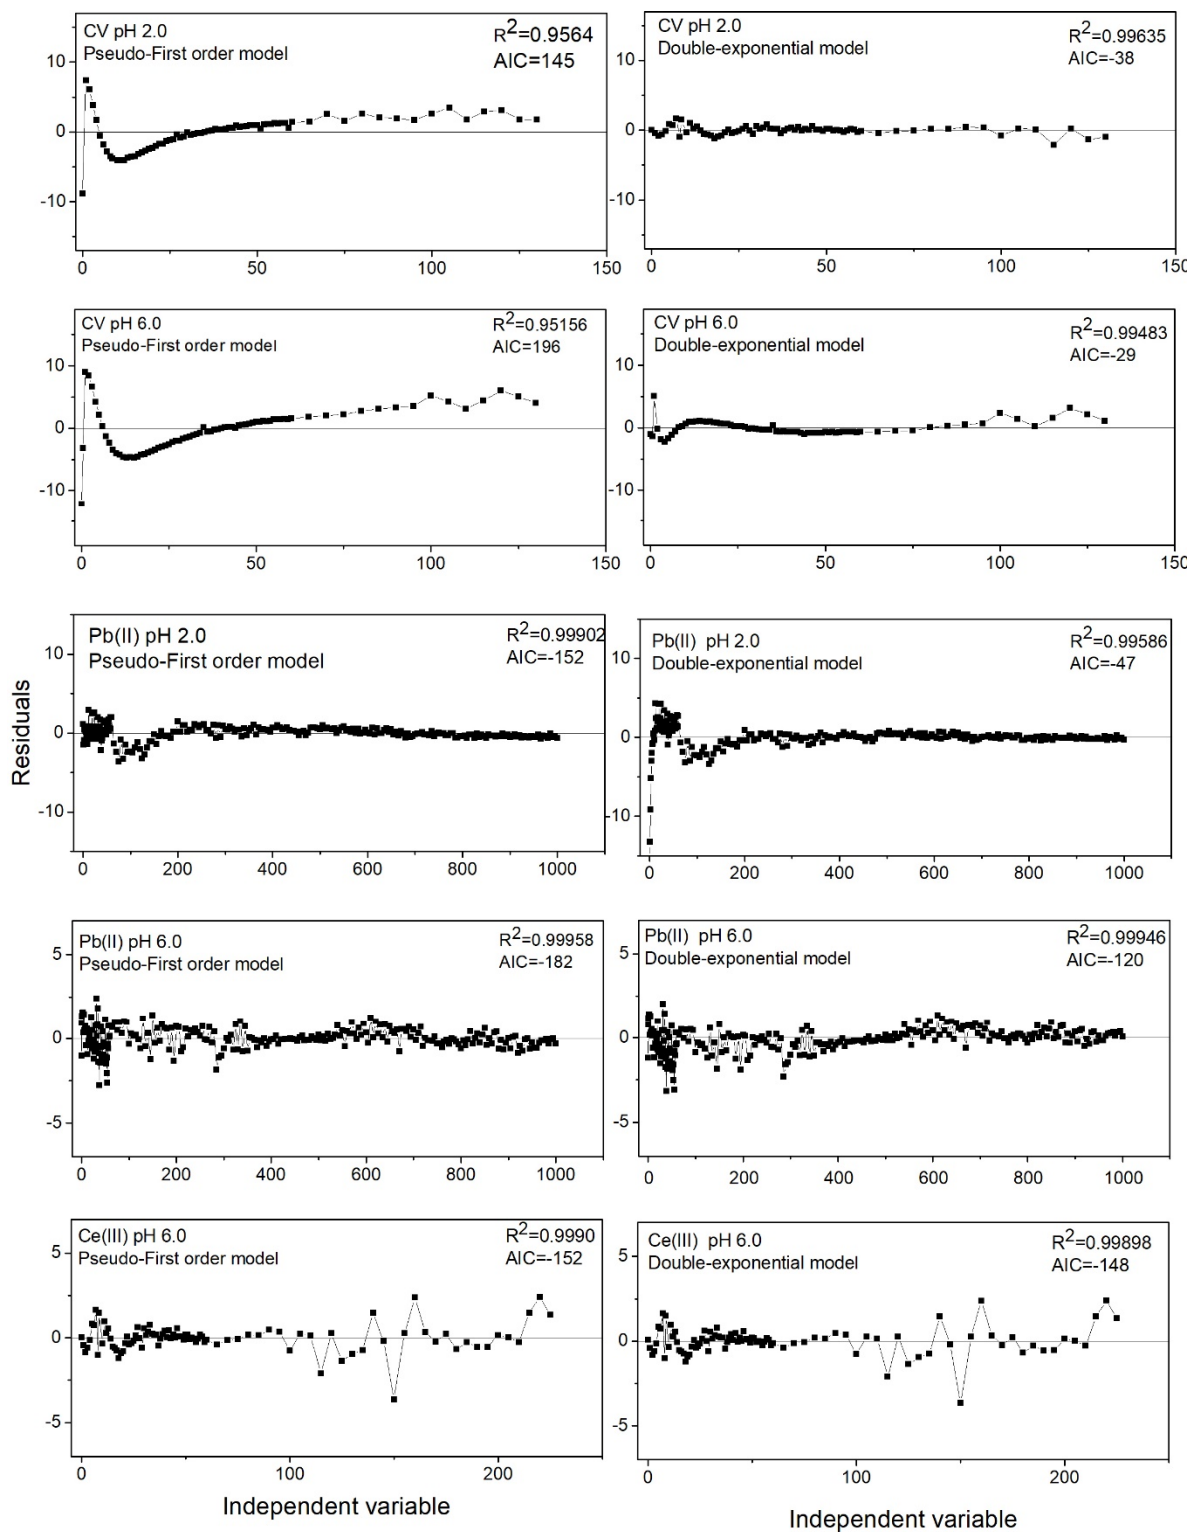

**Figure S2.** Residuals plot for the kinetic profiles reported in Figure 6 fitted by Pseudo-first order and Double Exponential Models.
